# Supplementary material for: MicroRNAs as Potential Regulators of GSK-3β in Renal Cell Carcinoma
Source: MDPI journal article supplement (doi:10.3390/cimb45090470), 2023-09-11
Supplement: s1 [file s1]

# MicroRNAs as Potential Regulators of GSK-3 $\beta$ in Renal Cell Carcinoma

## Supplementary Materials

A A498

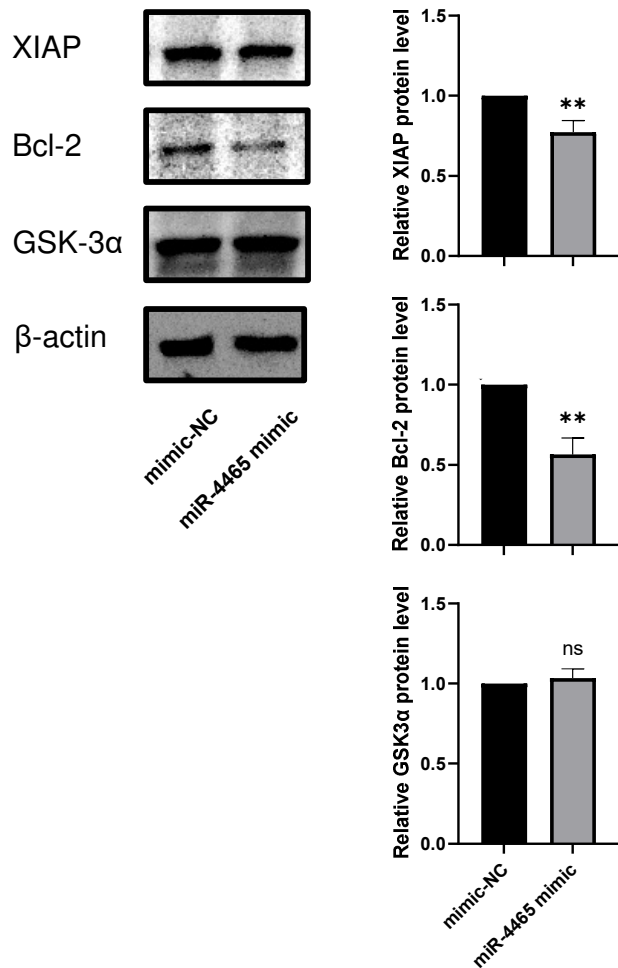

B Caki-1

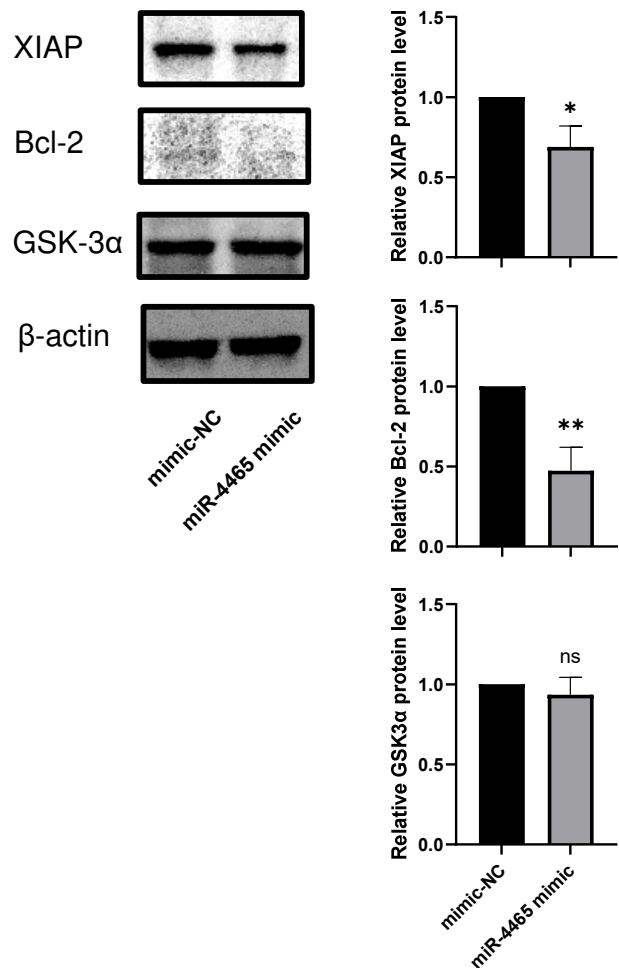

**Supplementary Figure 1. (A, B) Western blot analysis detected the protein levels of X-linked inhibitor of apoptosis protein (XIAP), B-cell lymphoma factor 2 (Bcl-2), and glycogen synthase kinase-3 $\alpha$  (GSK-3 $\alpha$ ) after transfection of the cell lines with hsa-miR-4465 (miR-4465). A: A498 cells, B: Caki-1 cells. The intensity of the bands was quantified using the ImageJ software. NC - negative control. Data are shown as mean  $\pm$  standard deviation (SD); ns - not significant; \* $p < 0.05$ , \*\* $p < 0.01$ .**

## A A498

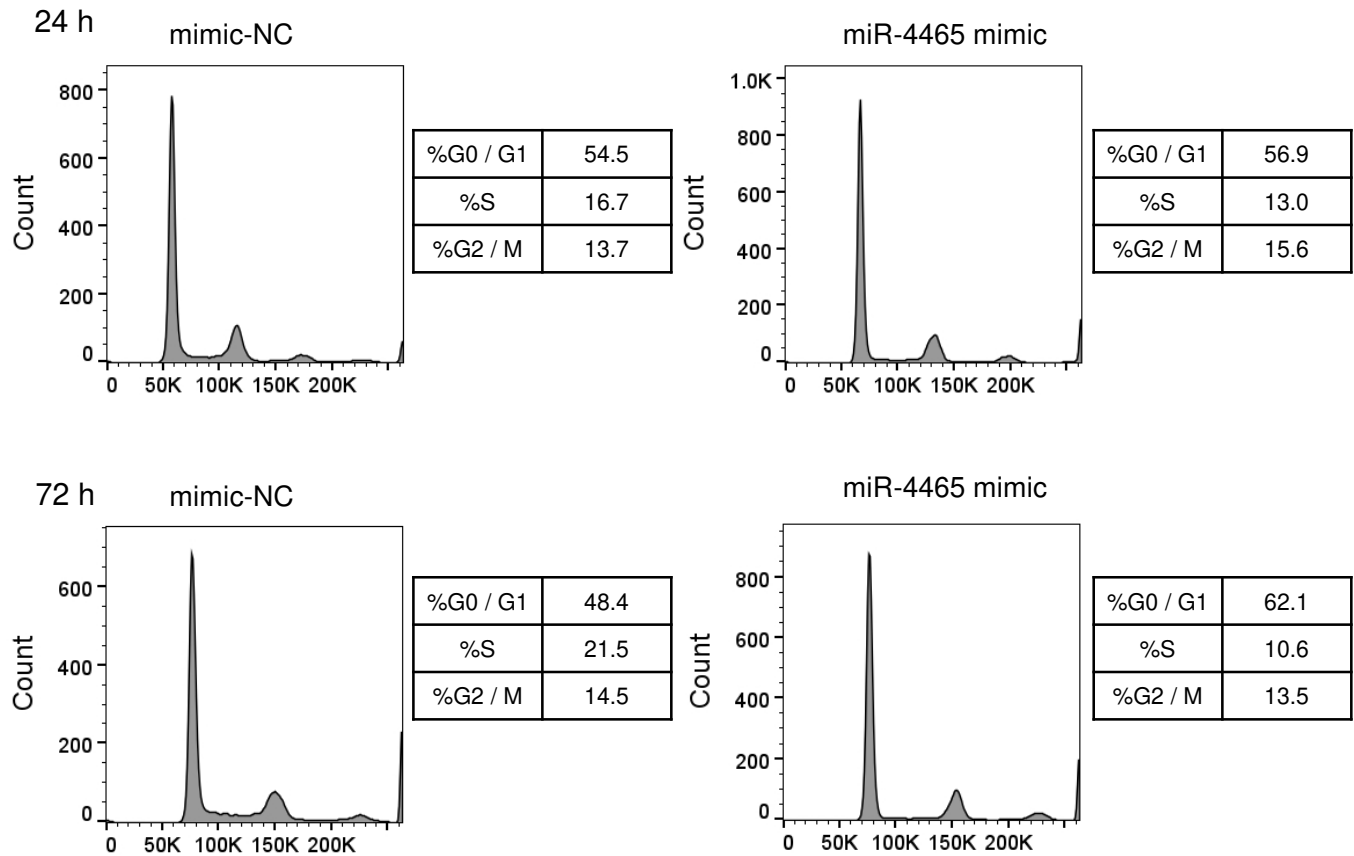

## B Caki-1

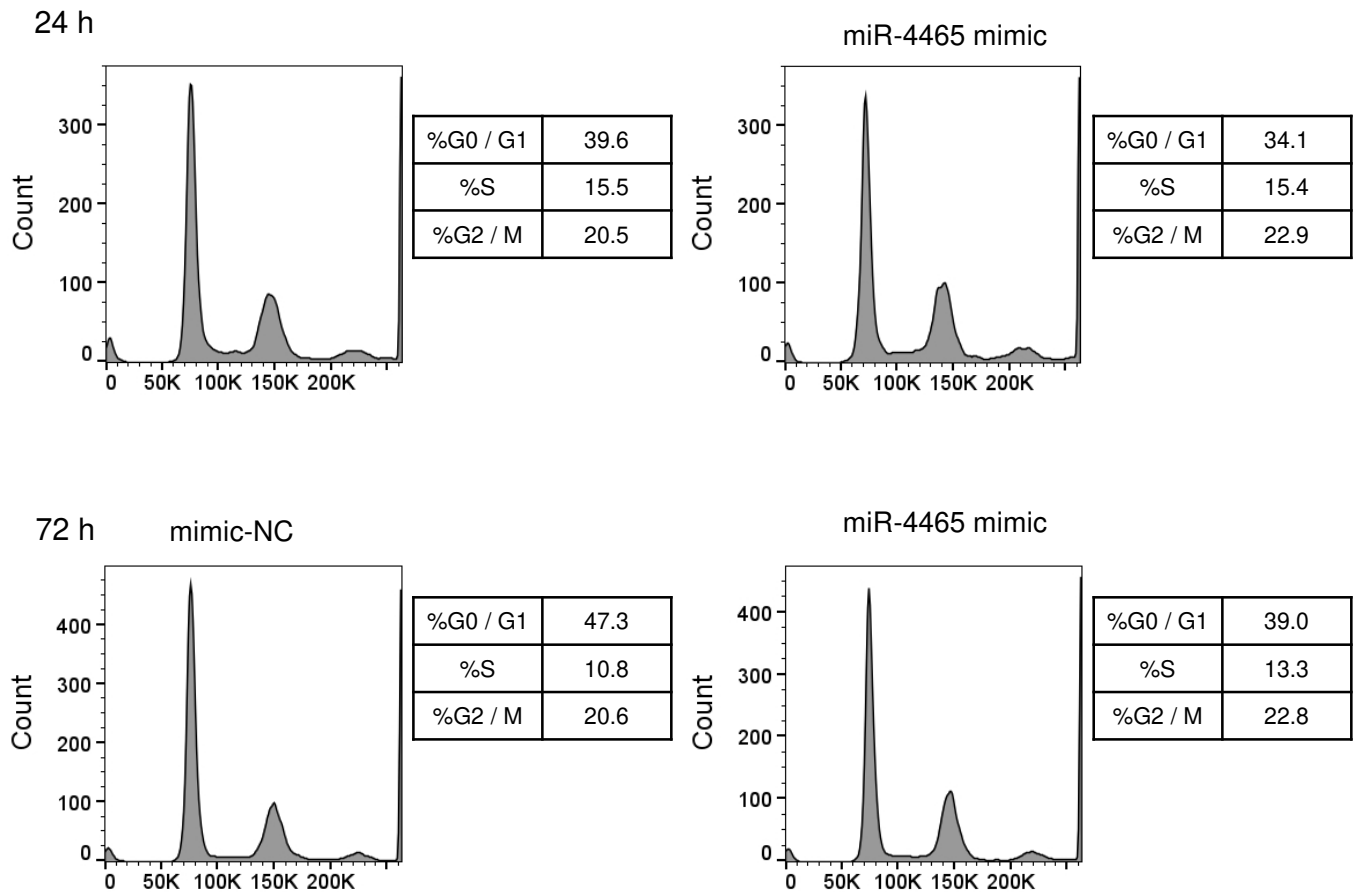

**Supplementary Figure 2. (A,B) Effect of hsa-miR-4465 (miR-4465) overexpression on the cell cycle 24 and 72 hours after transfection. A: A498 cells, B: Caki-1 cells.**
